# Supplementary material for: Hydrogenation of allyl alcohols catalyzed by aqueous palladium and platinum nanoparticles
Source: Royal Society of Chemistry journal article supplement (doi:10.1039/c5ra13840j), 2015-01-01
Supplement: c5ra13840j1.pdf [file c5ra13840j1.pdf]

## Hydrogenation of Allyl Alcohols Catalyzed by Aqueous Palladium and Platinum Nanoparticles

Krystel Di Pietrantonio, Francesca Coccia, Lucia Tonucci, Nicola d'Alessandro and Mario Bressan

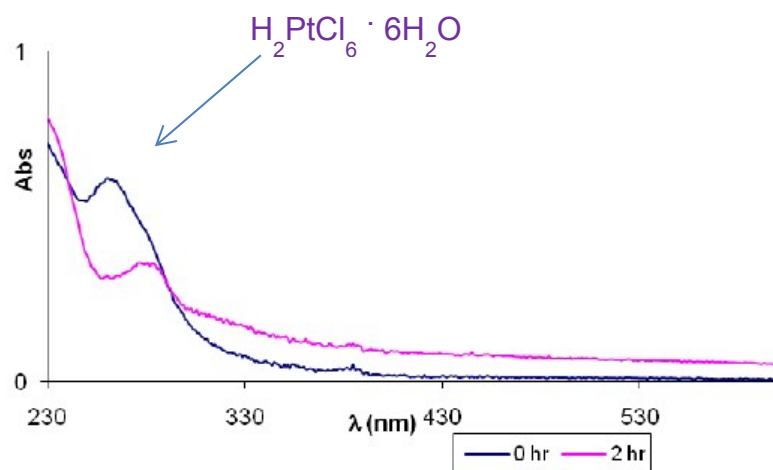

Fig. S1: UV-vis spectra of reaction mixture during Pt CaLig NPs synthesis. Blu: starting mixture; fuchsia: after 2 h at 80°C.

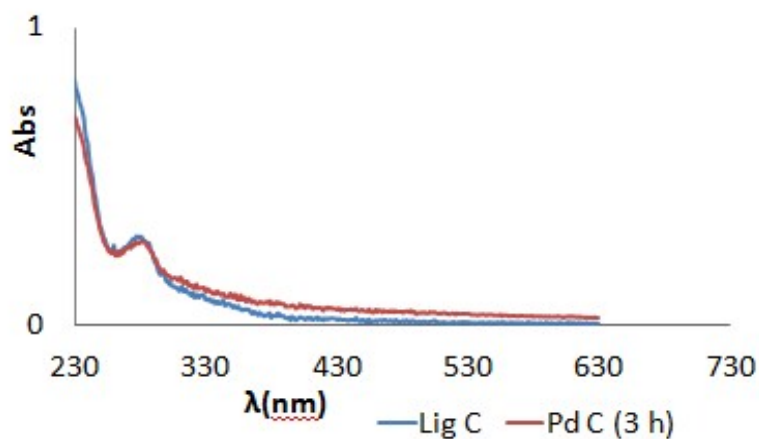

Fig. S2: UV-vis spectra of reaction mixture during Pd CaLig NPs synthesis. Blu: starting mixture; red: after 3 h at 80°C.

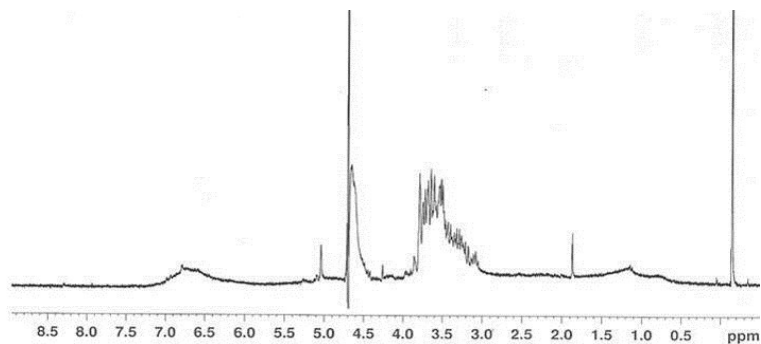

Fig. S3:  $^1\text{H}$  NMR spectrum of NaLig in water solution.

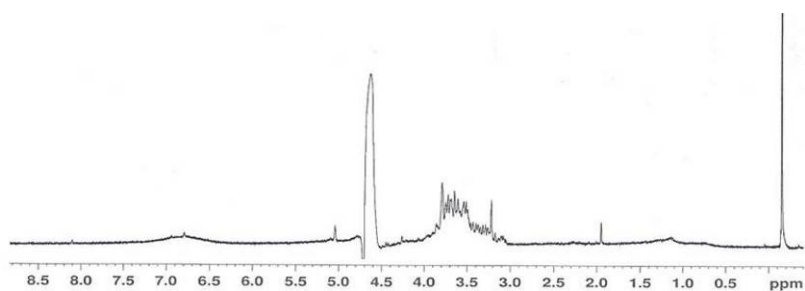

Fig. S4:  $^1\text{H}$  NMR spectrum of Pd NaLig in water solution.

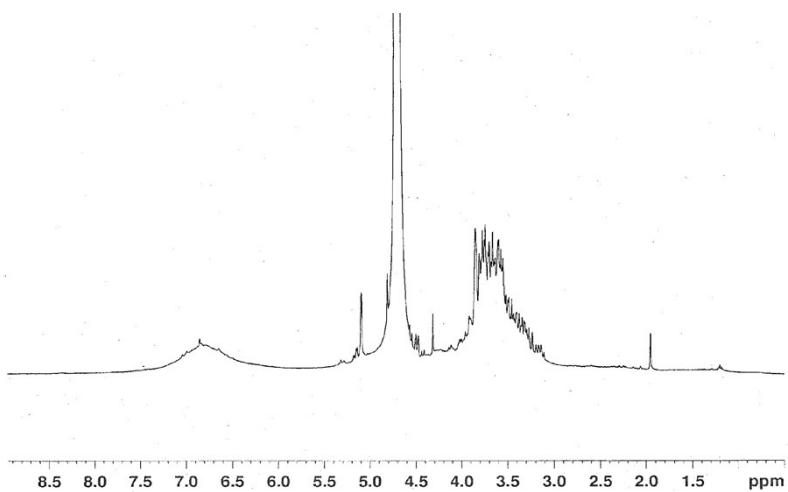

Fig. S5:  $^1\text{H}$  NMR spectrum of CaLig in water solution.

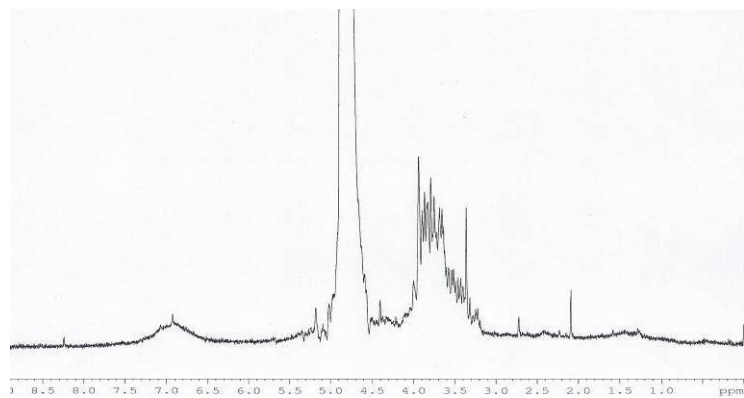

Fig. S6:  $^1\text{H}$  NMR spectrum of PtCaLig NPs in water solution.

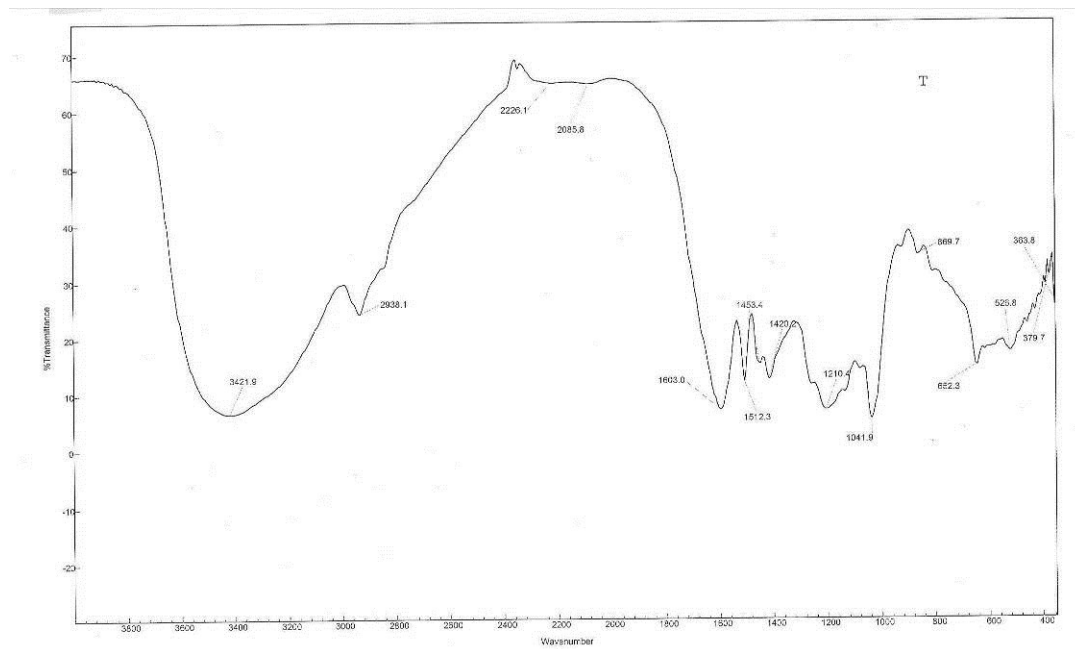

Fig. S7: FT-IR spectra of NaRO Lignin.

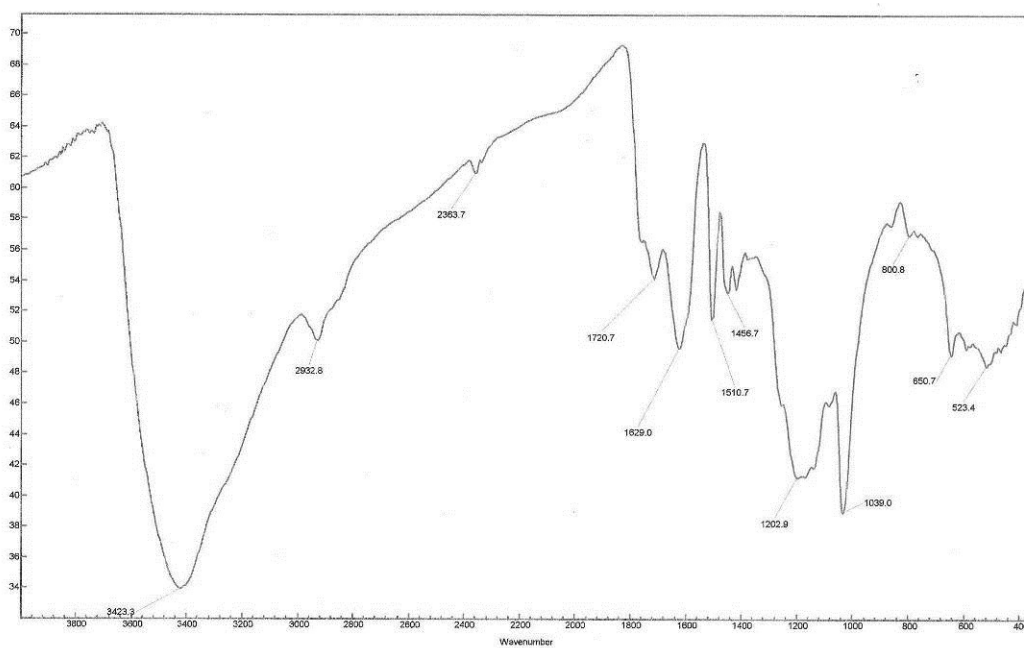

Fig. S8: FT-IR spectra of NaROLig Pd NPs.

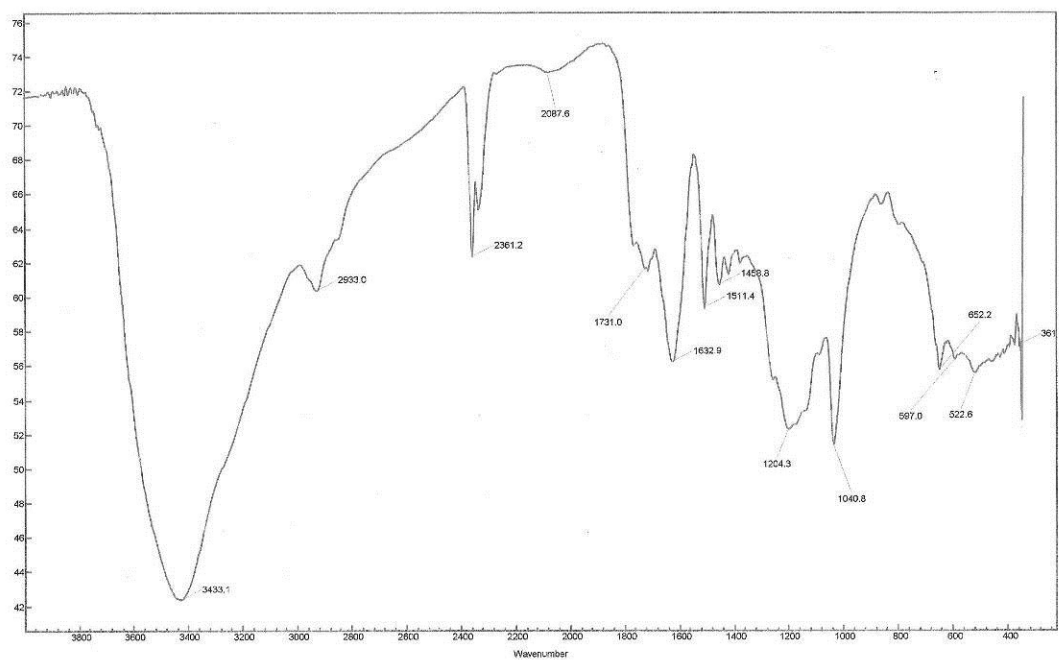

Fig. S9: FT-IR spectra of NaROLig Pt NPs.

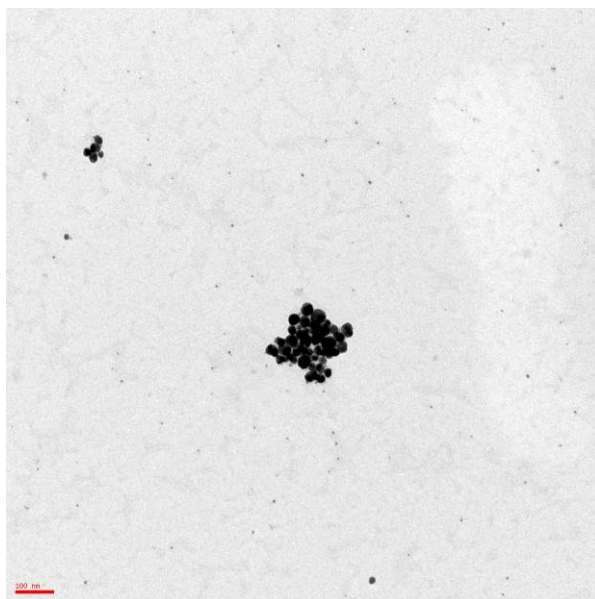

Fig. S10: TEM of AmLig Pd NPs.

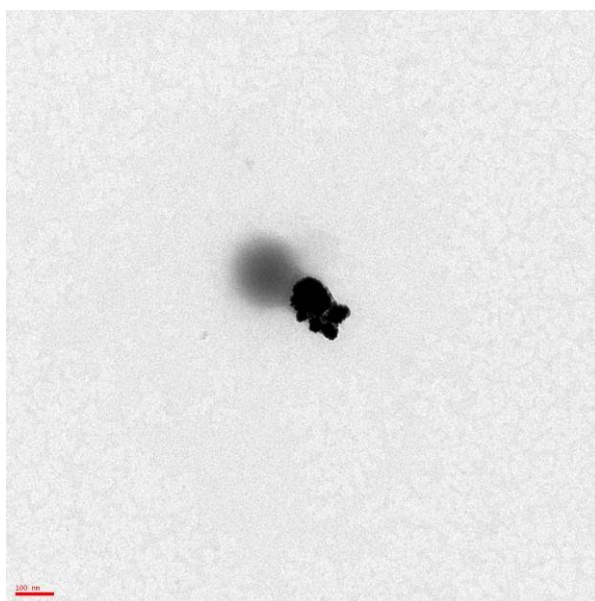

Fig. S11: TEM of AmLig Pt NPs.

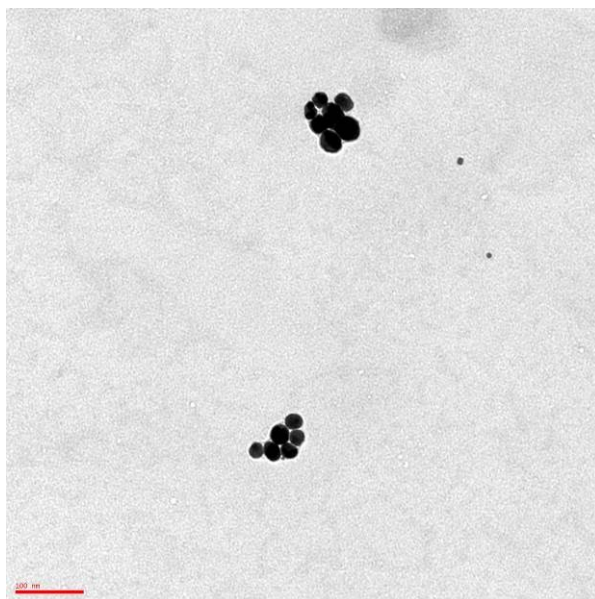

Fig. S12: TEM of CaLig Pd NPs.

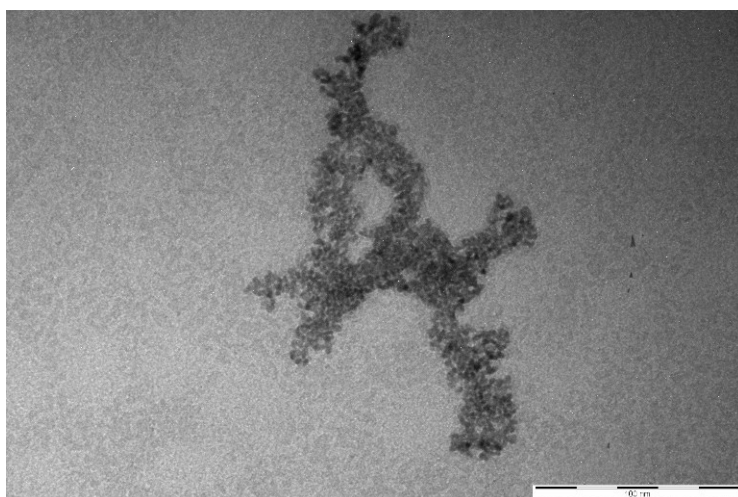

Fig. S13: TEM of CaLig Pt NPs.

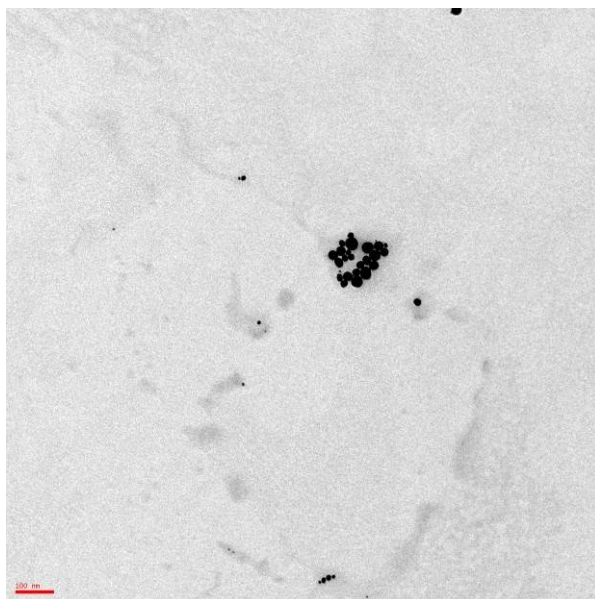

Fig. S14: TEM of NaLig Pd NPs.

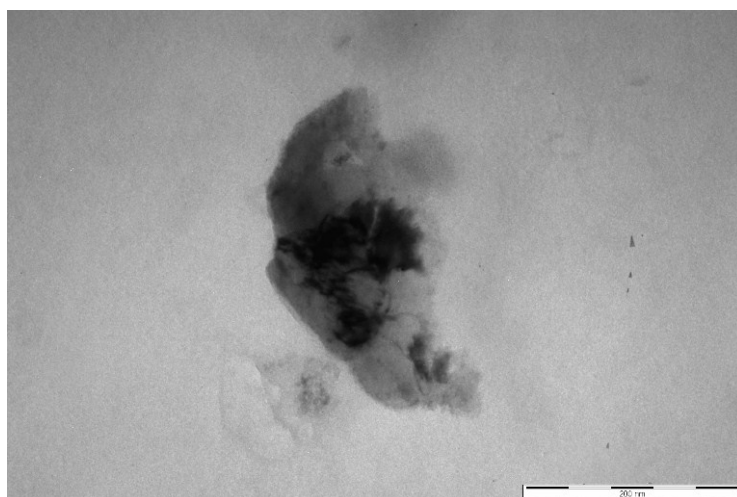

Fig. S15: TEM of NaLig Pt NPs.

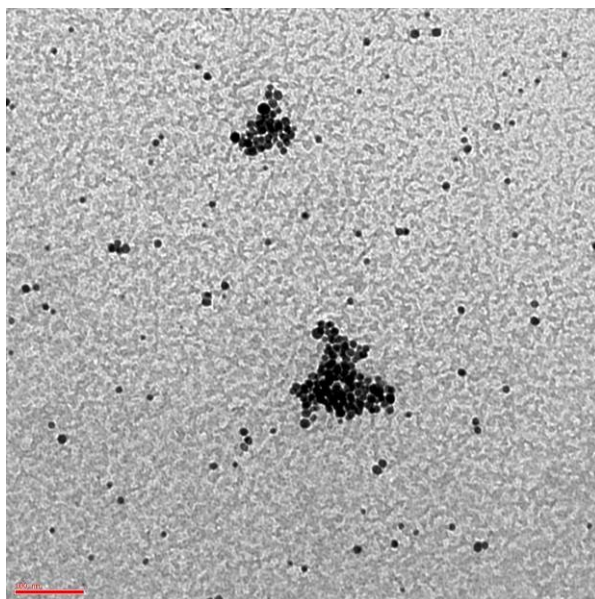

Fig. S16: TEM of NaROLig Pd NPs.

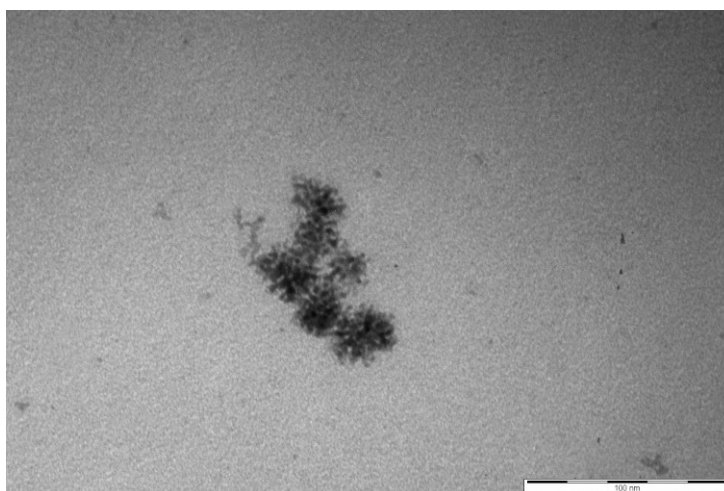

Fig. S17: TEM of NaROLig Pt NPs.



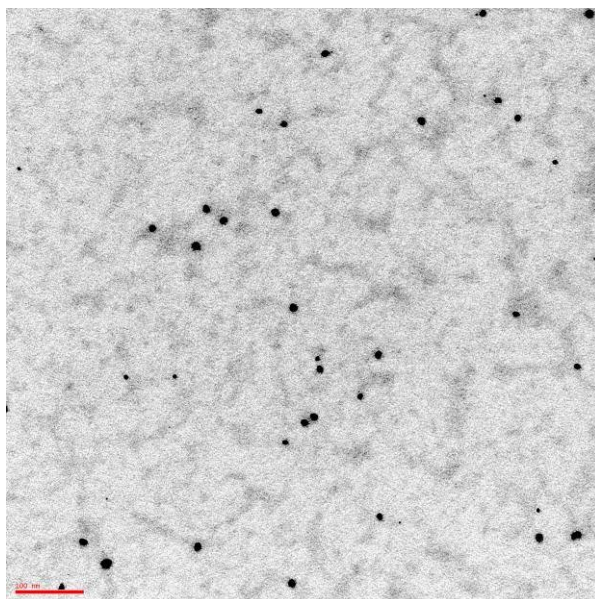

Fig. S18: TEM of KrLig Pd NPs.

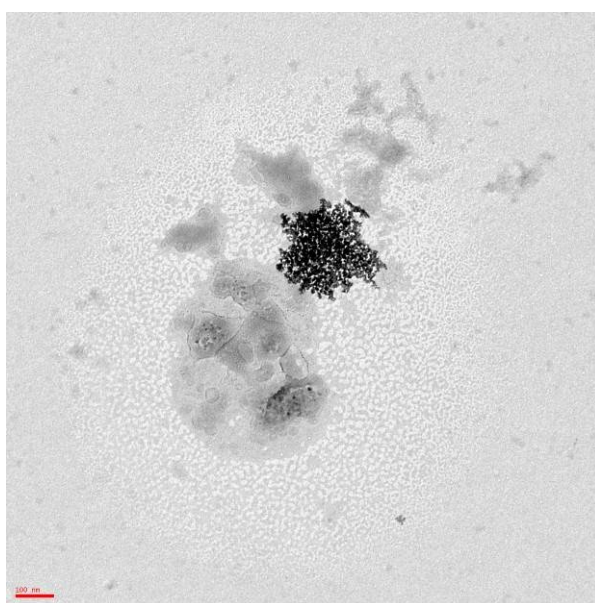

Fig. S19: TEM of KrLig Pt NPs.

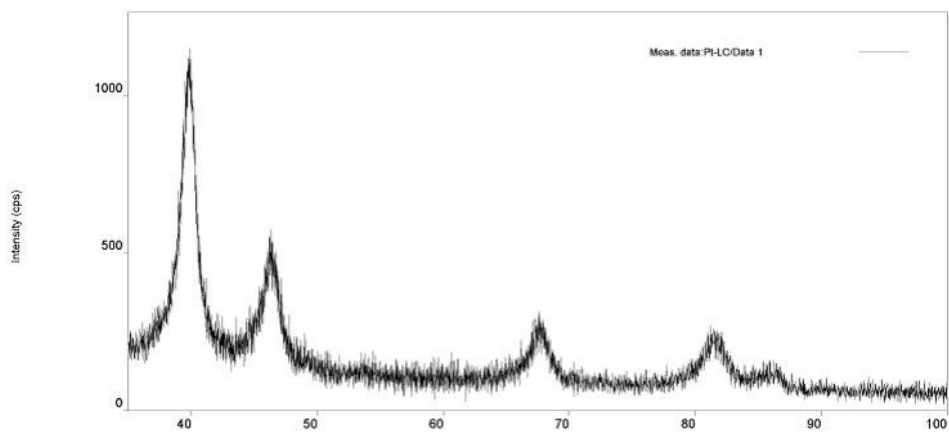

Fig. S20: XRD of Pt CaLig NPs.

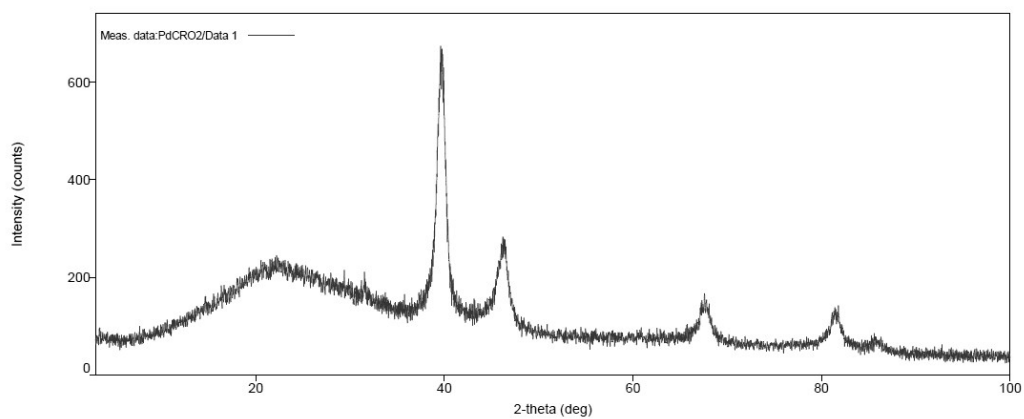

Fig. S21: XRD of Pd CaROLig NPs.

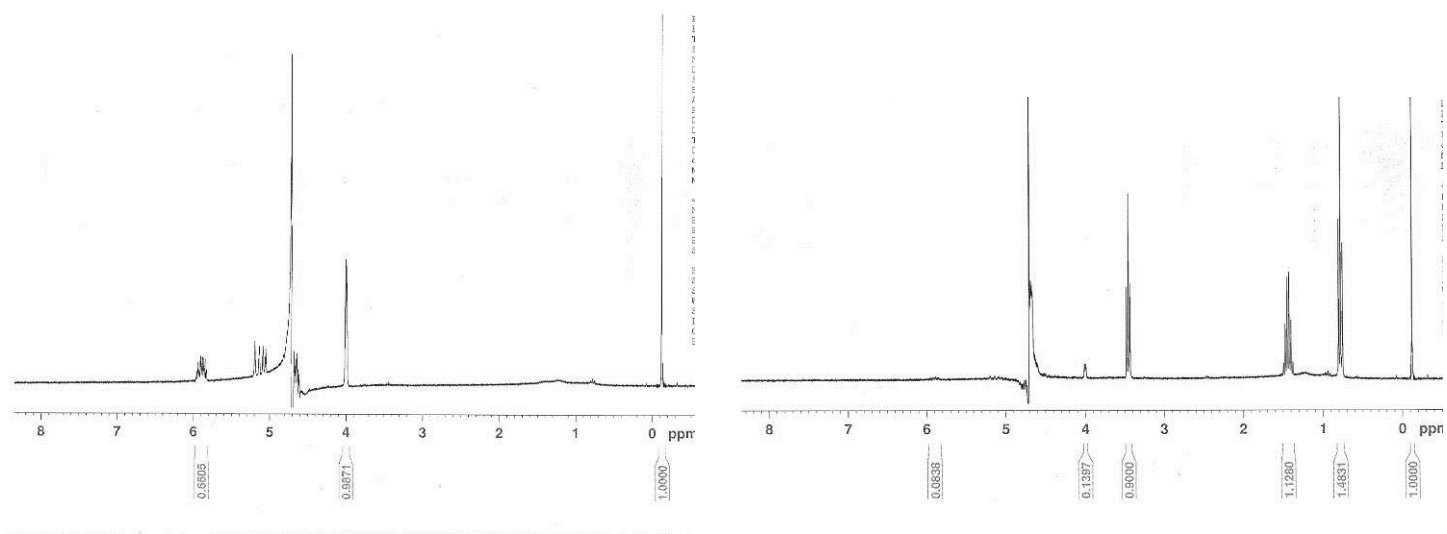

Fig. S22: <sup>1</sup>H NMR spectra of water mixture reaction of allyl alcohol with Pt NaLig NPs at 0h (left) and 24h (right).

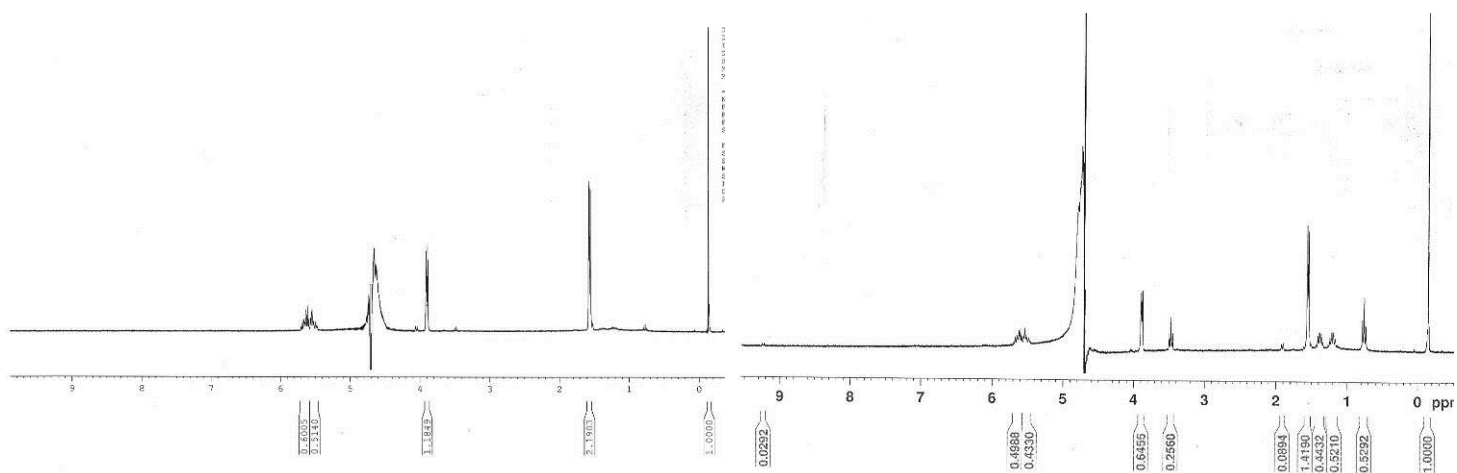

Fig. S23: <sup>1</sup>H NMR spectra of water mixture reaction of 2-buten-1-ol with Pt NaLig NPs at 0h (left) and 24h (right).

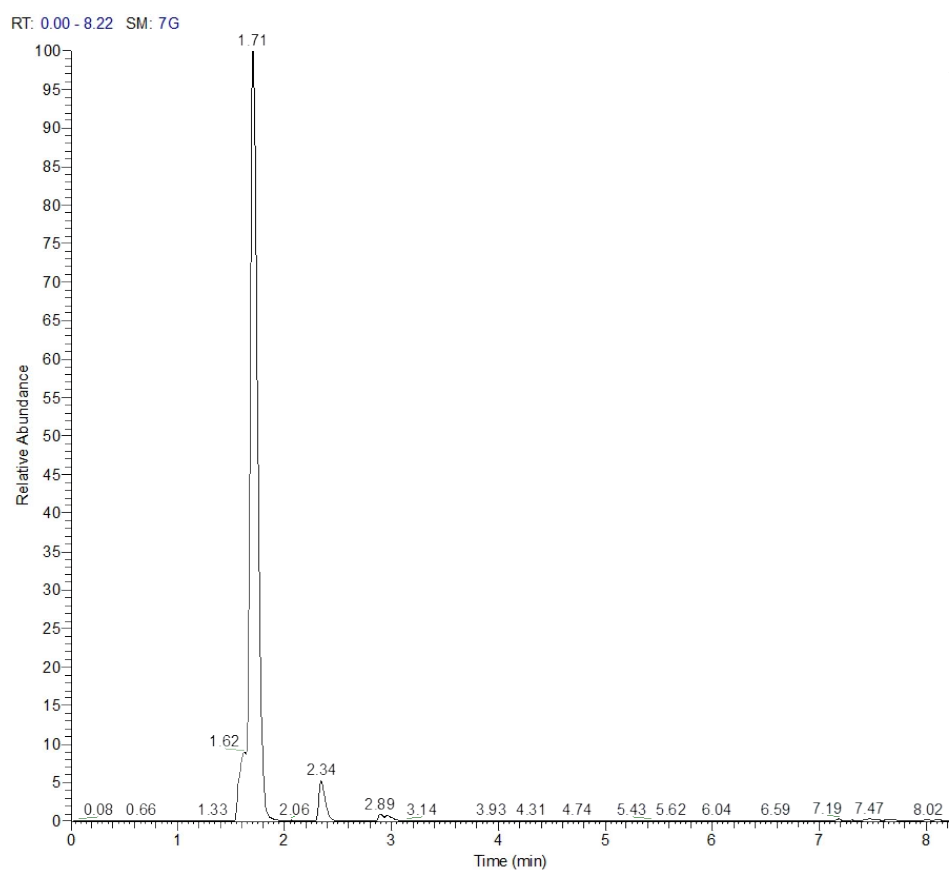

Fig. S24: Headspace GC chromatogram of 2-buten-1-ol in presence of Pt CaROLig NPs and H<sub>2</sub>.

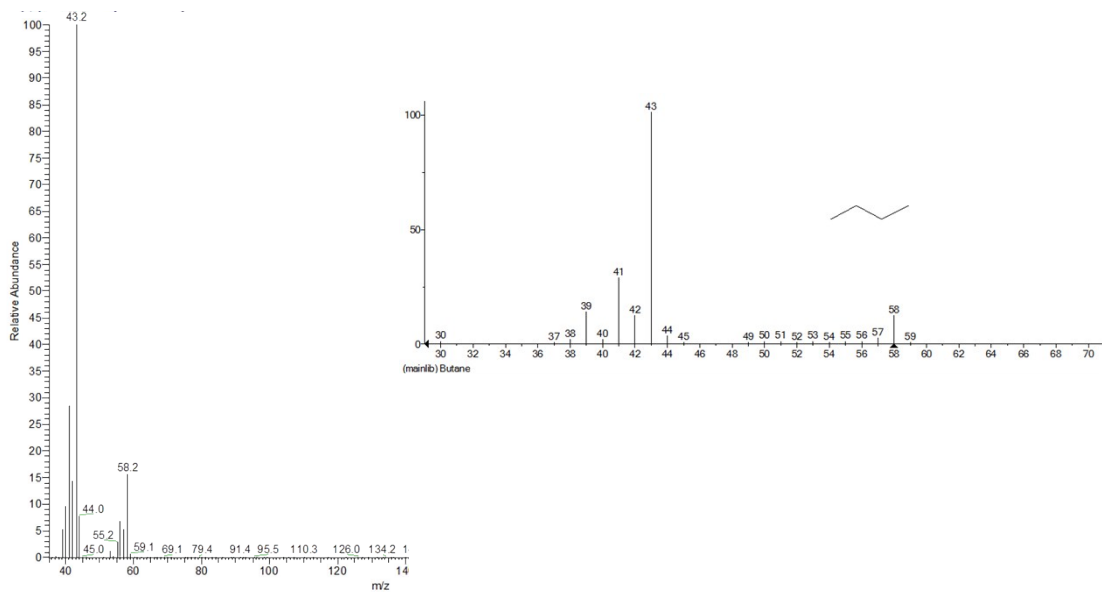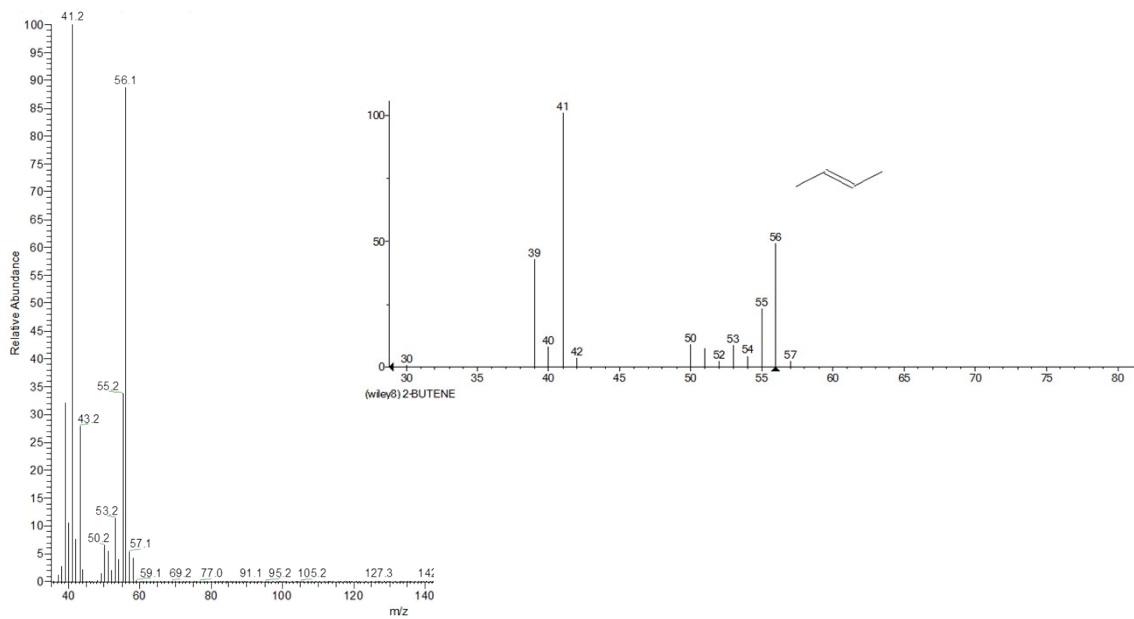

Fig. S25: MS spectra of signals in chromatogram at Fig. S24. RT = 1.62 (above) and RT = 1.71 (below) comparing with butane and 2-butene spectra of MS database.

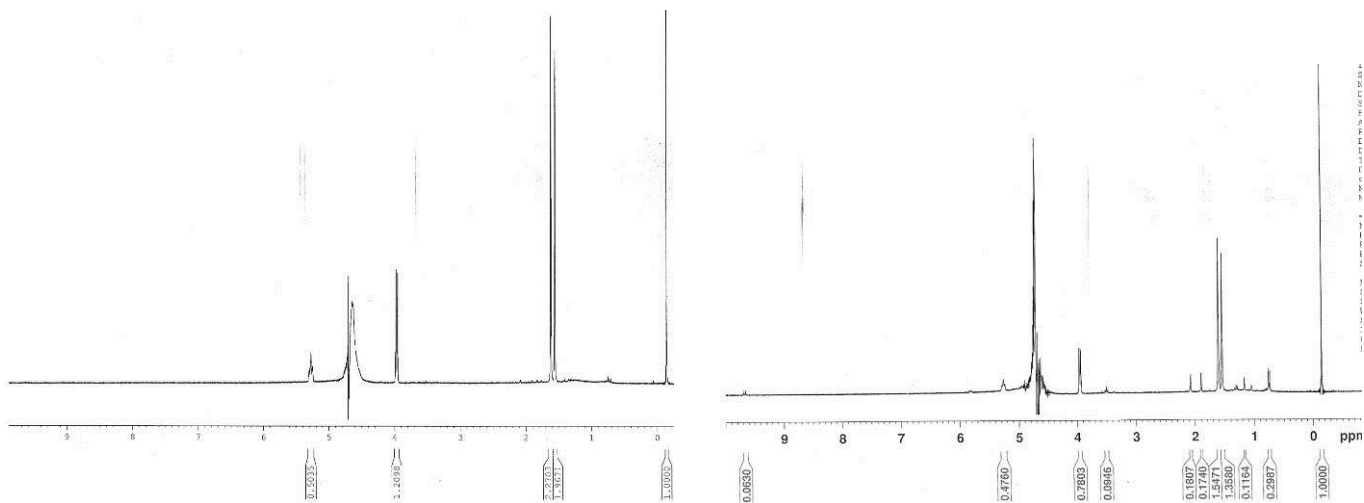

Fig. S26:  $^1\text{H}$  NMR spectra of water mixture reaction of 3-methyl-2-buten-1-ol with Pt NaLig NPs at 0h (left) and 24h (right).

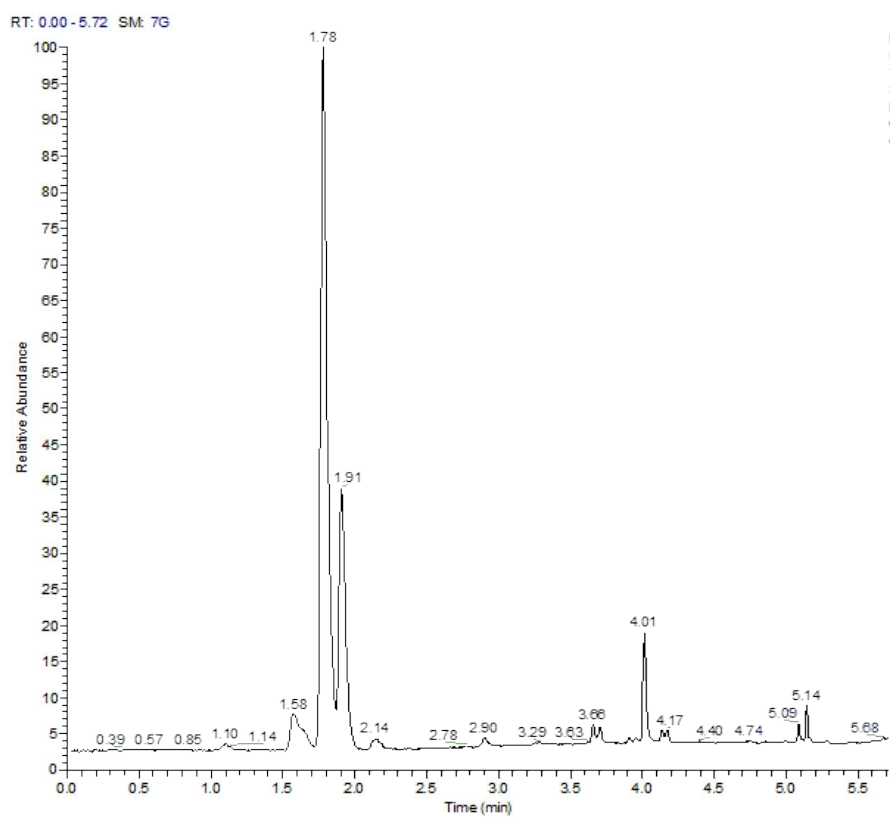

Fig. S27: Headspace GC chromatogram of 3-methyl-2-buten-1-ol in presence of Pt CaROLig NPs and  $\text{H}_2$ .

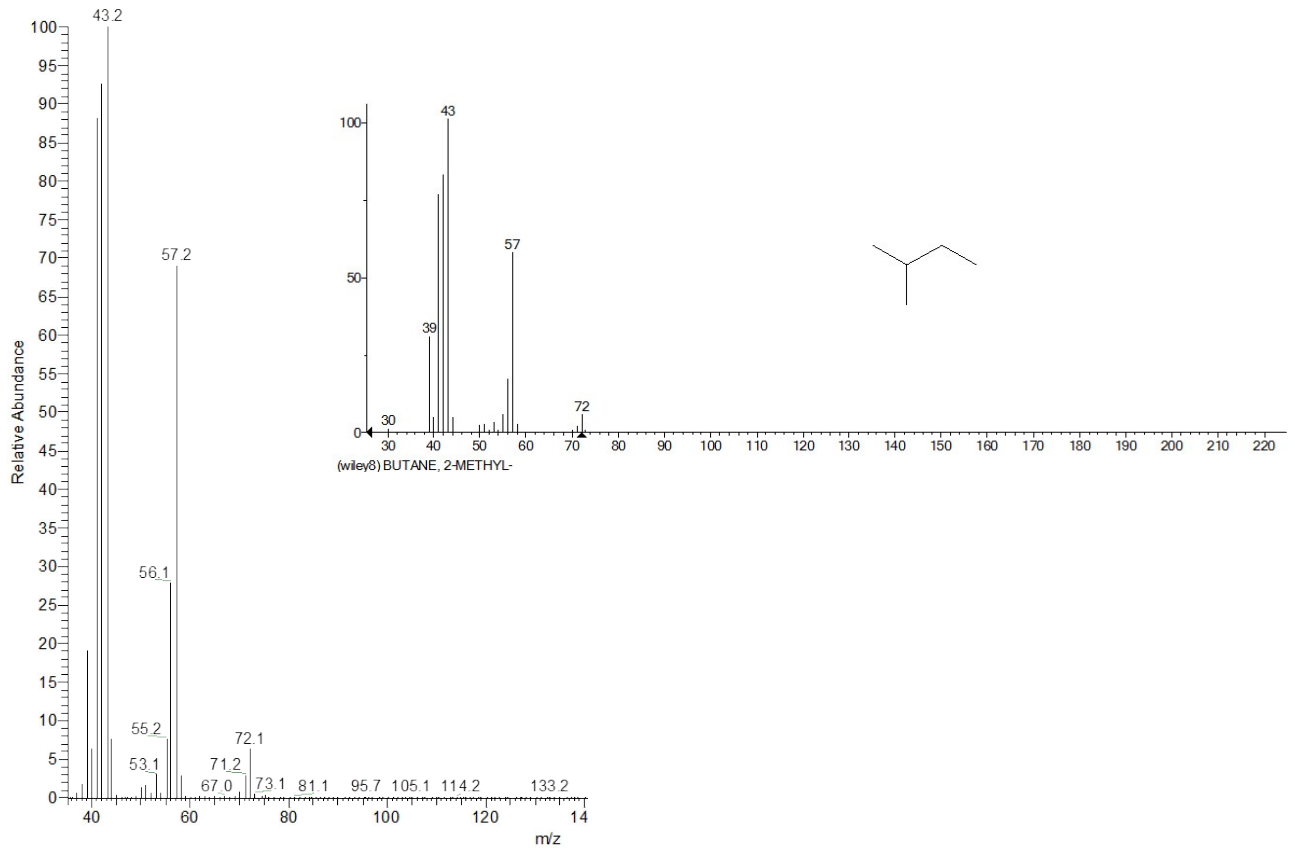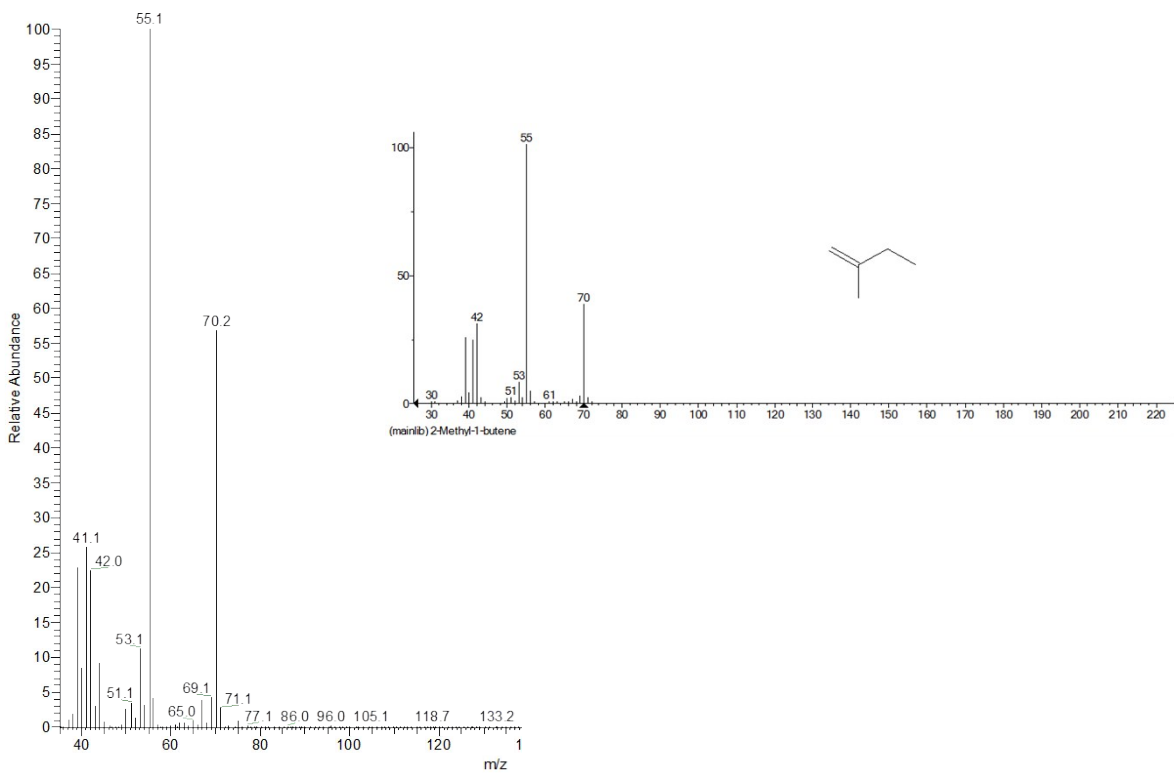

Fig. S28: MS spectra of signals in chromatogram at Fig. S27. RT = 1.71 (above) and RT = 1.91 (below) comparing with 2-methylbutane and 2-methylbutene spectra of MS database.

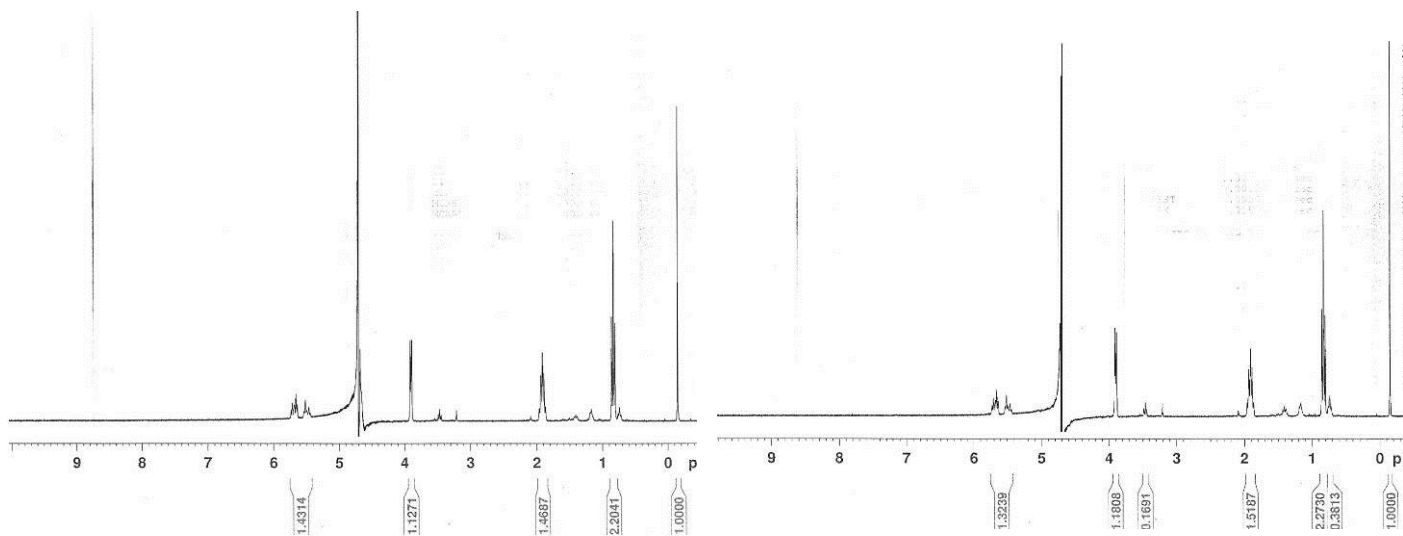

Fig. S29: <sup>1</sup>H NMR spectra of water mixture reaction of *trans*-2-pentanol with Pt AmLig NPs at 0h (left) and 24h (right).

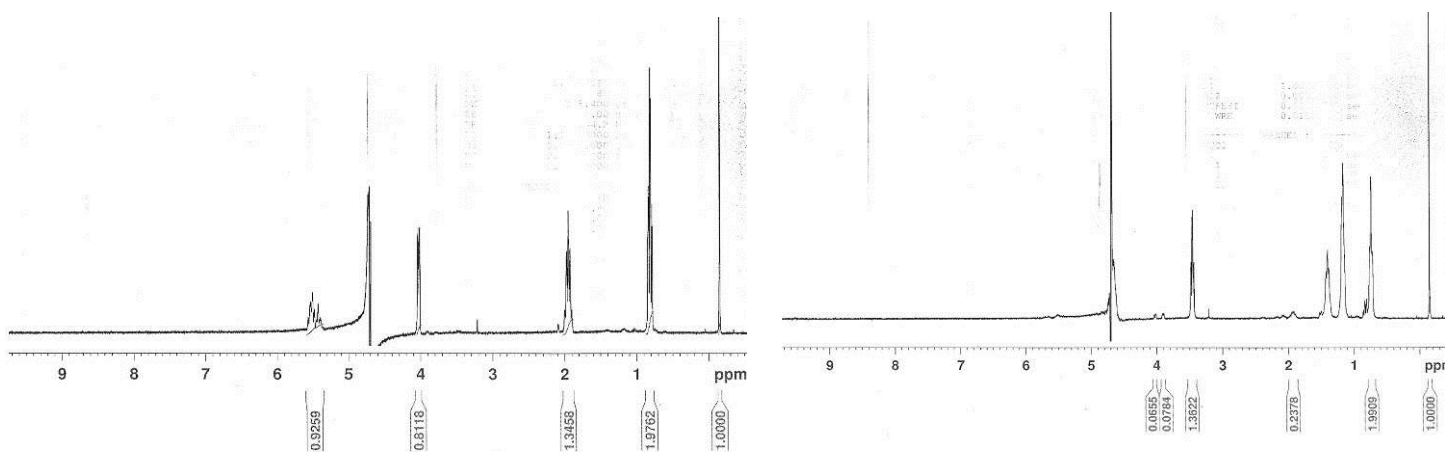

Fig. S30: <sup>1</sup>H NMR spectra of water mixture reaction of *cis*-2-pentanol with Pt CaLig NPs at 0h (left) and 24h (right).



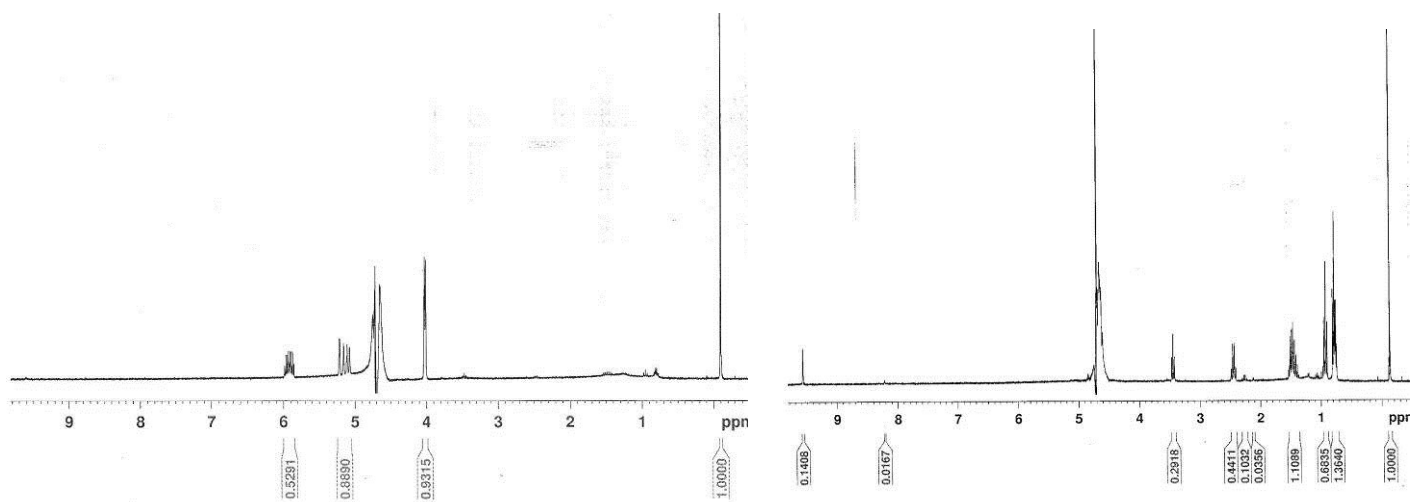

Fig. S31:  $^1\text{H}$  NMR spectra of water mixture reaction of 2-propen-1-ol with Pd CaLig NPs at 0h (left) and 24h (right).

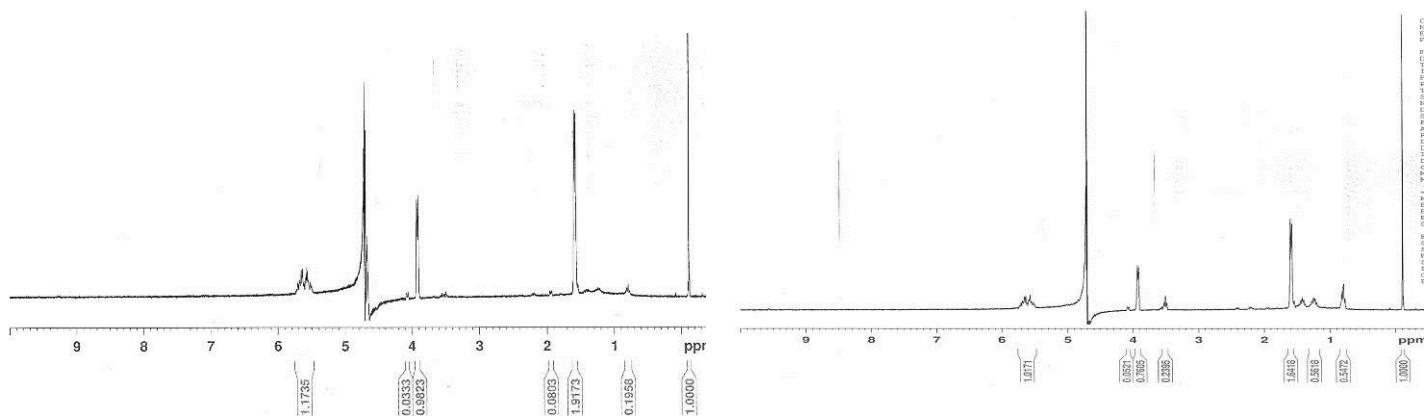

Fig. S32:  $^1\text{H}$  NMR spectra of water mixture reaction of 2-buten-1-ol with Pd NaLig NPs at 0h (left) and 24h (right).

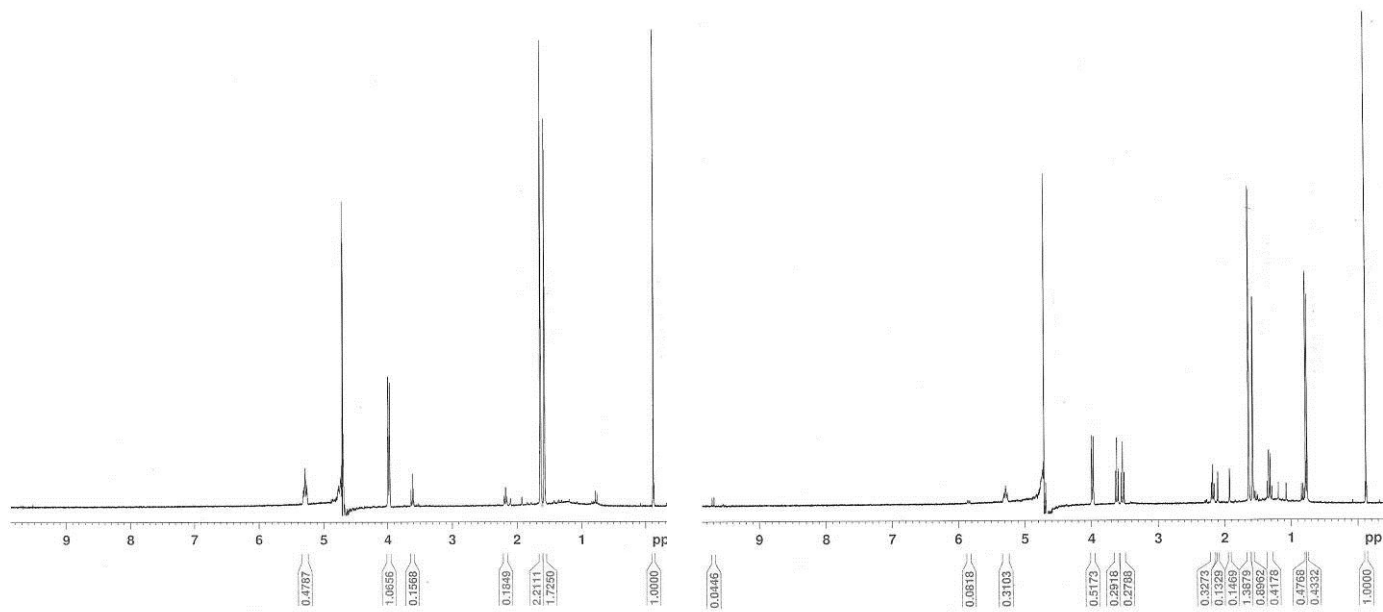

Fig. S33: <sup>1</sup>H NMR spectra of water mixture reaction of 3-methyl-2-buten-1-ol with Pd NaLig NPs at 0h (left) and 24h (right).

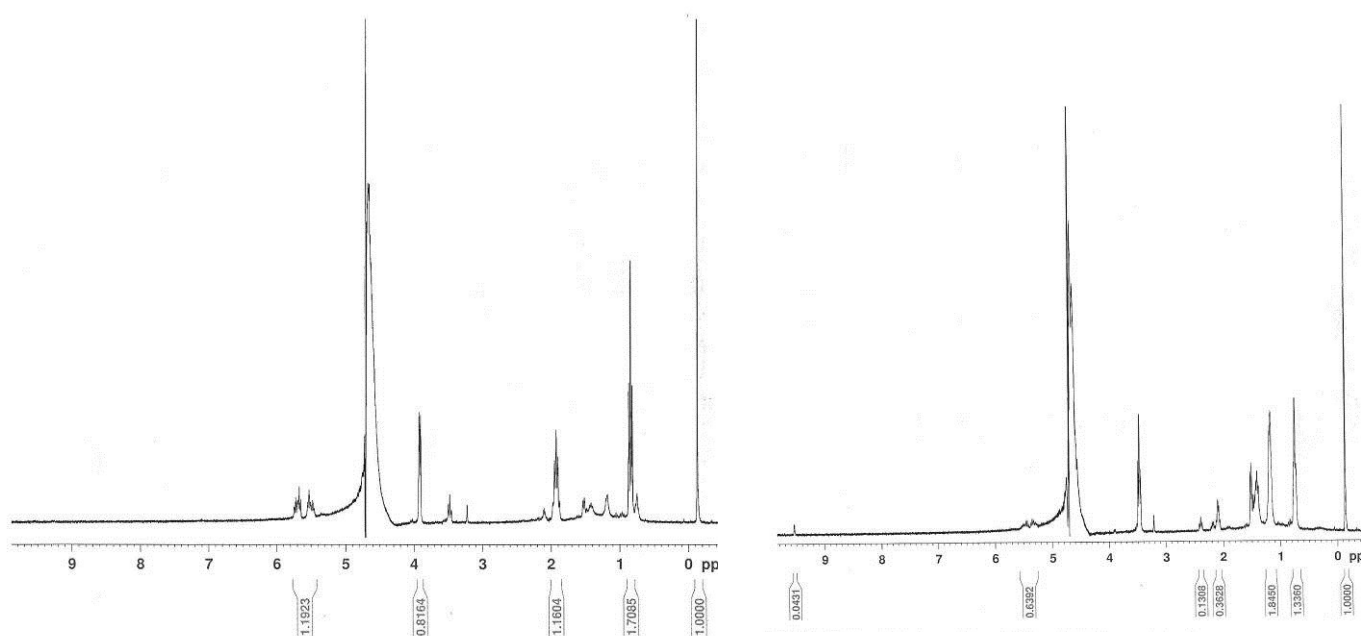

Fig. S34: <sup>1</sup>H NMR spectra of water mixture reaction of *trans*-2-pentenol with Pd NaLig NPs at 0h (left) and 24h (right).

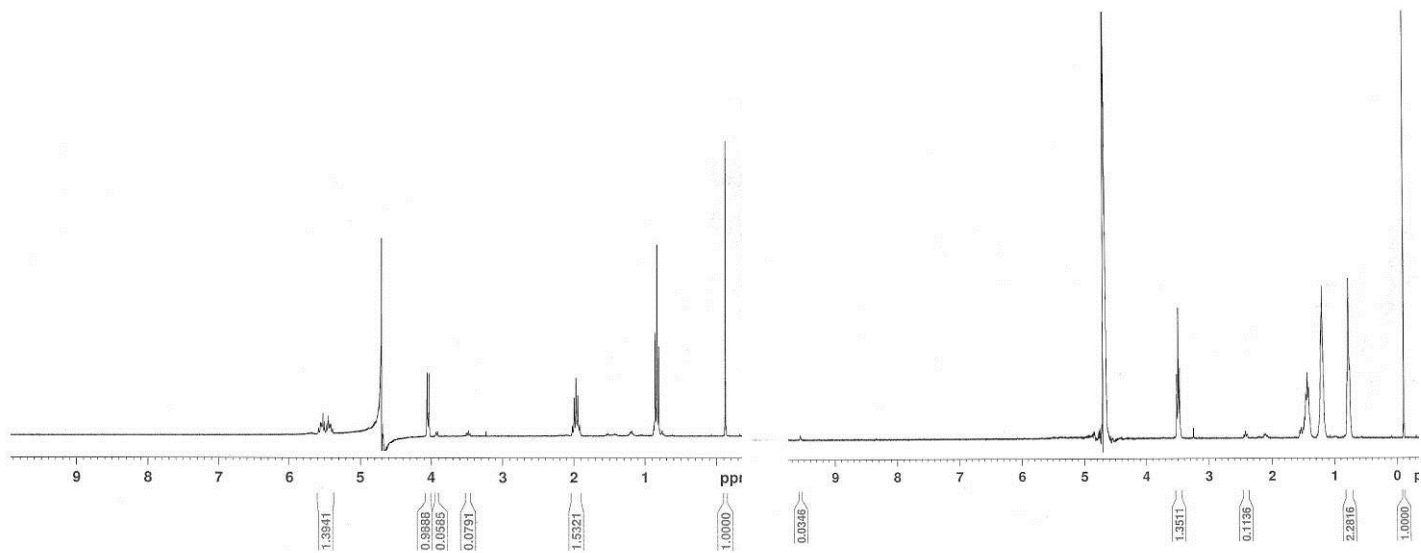

Fig. S35:  $^1\text{H}$  NMR spectra of water mixture reaction of *cis*-2-pentanol with Pd NaROLig NPs at 0h (left) and 24h (right).
